# Supplementary material
Source: publisher figshare collection journal article supplement (https://tandf.figshare.com/ndownloader/files/31080176)
Supplement: Supplementary file 1 [file 31080176]

**Supplemental Tables**

Table S1. Cytokine release from human PBMC induced by various immobilized antibodies under non-HDC conditions………………………………. 2

Table S2. Cytokine release from human PBMC induced by various immobilized antibodies under HDC conditions…………………………………… 16

Table S1. Cytokine release from human PBMC induced by various immobilized antibodies under non-HDC conditions.

| **TNFα (pg/mL)** |  | Donor | | | | | |
| --- | --- | --- | --- | --- | --- | --- | --- |
| Test article | Concentration (μg/well) | Donor 1 | Donor 2 | Donor 3 | Donor 4 | Donor 5 | Donor 6 |
| Panitumumab | 0.1 | 170.77 | 103.05 | 21.99 | 44.46 | 311.61 | 356.01 |
| 0.3 | 209.48 | 140.98 | 65.35 | 83.71 | 449.63 | 583.39 |
| 1 | 235.42 | 177.83 | 145.62 | 286.16 | 541.33 | 842.95 |
| 3 | 201.69 | 211.43 | 305.59 | 546.39 | 453.84 | 739.72 |
| Maximum | 235.42 | 211.43 | 305.59 | 546.39 | 541.33 | 842.95 |
| Trastuzumab | 0.1 | 506.44 | 545.76 | 567.36 | 687.33 | 1347.31 | 557.32 |
| 0.3 | 784.84 | 1141.64 | 794.85 | 1613.47 | 1965.91 | 1625.79 |
| 1 | 880.99 | 1125.25 | 983.69 | 2363.91 | 2430.05 | 1937.17 |
| 3 | 806.24 | 1392.99 | 1202.33 | 2318.33 | 2313.18 | 1835.98 |
| Maximum | 880.99 | 1392.99 | 1202.33 | 2363.91 | 2430.05 | 1937.17 |
| Rituximab | 0.1 | 380.46 | 429.07 | 363.59 | 396.45 | 969.59 | 632.93 |
| 0.3 | 614.67 | 608.37 | 501.20 | 1016.96 | 1777.21 | 919.97 |
| 1 | 647.52 | 996.54 | 598.13 | 1980.74 | 2472.70 | 2153.94 |
| 3 | 626.10 | 990.78 | 441.81 | 1323.53 | 1537.98 | 1166.78 |
| Maximum | 647.52 | 996.54 | 598.13 | 1980.74 | 2472.70 | 2153.94 |
| Alemtuzumab | 0.1 | 224.65 | 264.02 | 146.18 | 133.14 | 412.54 | 111.74 |
| 0.3 | 695.46 | 623.21 | 340.83 | 1077.28 | 1146.90 | 479.51 |
| 1 | 591.03 | 810.72 | 435.01 | 1858.77 | 1621.93 | 794.43 |
| 3 | 801.48 | 1072.98 | 856.04 | 2788.55 | 1932.31 | 1131.59 |
| Maximum | 801.48 | 1072.98 | 856.04 | 2788.55 | 1932.31 | 1131.59 |
| Anti-human CD3 mAb | 0.1 | 1379.19 | 2159.42 | 1651.58 | 1979.09 | 3166.23 | 1536.74 |
| 0.3 | 2416.40 | 2602.62 | 2903.22 | 3650.01 | 4717.85 | 4372.81 |
| 1 | 2296.53 | 3690.53 | 2449.09 | 4548.48 | 5593.22 | 4753.06 |
| 3 | 1771.54 | 3804.81 | 2971.72 | 4898.14 | 6107.79 | 3943.26 |
| Maximum | 2416.40 | 3804.81 | 2971.72 | 4898.14 | 6107.79 | 4753.06 |
| Anti-human CD28 SA mAb | 0.1 | 339.94 | 256.03 | 149.60 | 85.58 | 417.43 | 368.86 |
| 0.3 | 1565.22 | 1880.99 | 911.28 | 2564.59 | 3963.29 | 4014.16 |
| 1 | 9003.89 | 3448.04 | 2897.40 | 5945.81 | 16514.77 | 12230.84 |
| 3 | 12016.23 | 8263.27 | 5057.19 | 8900.86 | 30099.77 | 17793.74 |
| Maximum | 12016.23 | 8263.27 | 5057.19 | 8900.86 | 30099.77 | 17793.74 |
| PBS | 0 | 13.43 | 9.78 | 20.24 | 36.07 | 30.41 | 101.86 |
| Human IgG1 Ab | 0.1 | 409.77 | 228.67 | 130.08 | 114.40 | 465.66 | 243.51 |
| 0.3 | 806.89 | 747.21 | 581.29 | 1015.48 | 1566.77 | 1229.39 |
| 1 | 1025.06 | 756.20 | 1401.97 | 3333.06 | 2543.40 | 2591.46 |
| 3 | 1063.14 | 1196.12 | 2660.95 | 3885.14 | 2872.15 | 2680.39 |
| Maximum | 1063.14 | 1196.12 | 2660.95 | 3885.14 | 2872.15 | 2680.39 |
| Human IgG2 Ab | 0.1 | 54.66 | 33.62 | 23.44 | 84.71 | 87.20 | 122.92 |
| 0.3 | 162.10 | 133.71 | 45.12 | 111.41 | 772.87 | 757.33 |
| 1 | 326.14 | 328.93 | 364.42 | 314.59 | 1599.43 | 1727.94 |
| 3 | 414.79 | 425.98 | 843.55 | 1340.06 | 1948.26 | 2486.26 |
| Maximum | 414.79 | 425.98 | 843.55 | 1340.06 | 1948.26 | 2486.26 |
| Mouse IgG1 Ab | 0.1 | 88.88 | 44.33 | 58.13 | 83.08 | 203.52 | 274.93 |
| 0.3 | 167.42 | 107.42 | 193.10 | 238.37 | 730.54 | 941.33 |
| 1 | 262.73 | 183.45 | 216.68 | 549.33 | 978.87 | 1560.52 |
| 3 | 246.22 | 223.34 | 293.38 | 1121.87 | 1705.62 | 1730.85 |
| Maximum | 262.73 | 223.34 | 293.38 | 1121.87 | 1705.62 | 1730.85 |
| Mouse IgG2a Ab | 0.1 | 230.40 | 58.69 | 89.99 | 73.92 | 174.56 | 224.57 |
| 0.3 | 329.55 | 273.72 | 212.04 | 235.35 | 977.85 | 1590.14 |
| 1 | 408.26 | 262.31 | 240.33 | 470.52 | 1488.01 | 1914.97 |
| 3 | 444.39 | 446.22 | 666.51 | 1441.97 | 1548.28 | 2255.61 |
| Maximum | 444.39 | 446.22 | 666.51 | 1441.97 | 1548.28 | 2255.61 |
| LPS | 5* | 1906.22 | 2452.14 | 2346.66 | 3442.45 | 2003.32 | 1379.58 |
| PHA | 5* | 3440.19 | 4146.70 | 3329.60 | 6662.14 | 5594.87 | 2640.55 |

Table S1. Cytokine release from human PBMC induced by various immobilized antibodies under non-HDC conditions (continued).

| **IFNγ (pg/mL)** |  | Donor | | | | | |
| --- | --- | --- | --- | --- | --- | --- | --- |
| Test article | Concentration (μg/well) | Donor 1 | Donor 2 | Donor 3 | Donor 4 | Donor 5 | Donor 6 |
| Panitumumab | 0.1 | 14.73 | 0.00 | 0.41 | 0.00 | 18.45 | 11.51 |
| 0.3 | 11.09 | 6.32 | 0.00 | 1.64 | 13.48 | 13.31 |
| 1 | 11.09 | 6.32 | 0.64 | 4.48 | 19.28 | 9.71 |
| 3 | 10.18 | 8.50 | 0.46 | 0.44 | 15.13 | 13.31 |
| Maximum | 14.73 | 8.50 | 0.64 | 4.48 | 19.28 | 13.31 |
| Trastuzumab | 0.1 | 11.24 | 37.20 | 11.64 | 2.18 | 121.74 | 6.97 |
| 0.3 | 19.26 | 45.82 | 7.21 | 69.56 | 199.16 | 17.11 |
| 1 | 22.30 | 50.64 | 3.74 | 44.01 | 467.97 | 149.91 |
| 3 | 34.54 | 51.61 | 9.86 | 15.13 | 687.57 | 18.98 |
| Maximum | 34.54 | 51.61 | 11.64 | 69.56 | 687.57 | 149.91 |
| Rituximab | 0.1 | 11.24 | 20.26 | 3.74 | 0.43 | 35.45 | 7.88 |
| 0.3 | 12.23 | 18.41 | 3.74 | 10.44 | 784.94 | 3.37 |
| 1 | 21.29 | 25.85 | 7.21 | 15.13 | 375.98 | 10.63 |
| 3 | 9.25 | 24.91 | 12.54 | 20.83 | 49.33 | 18.98 |
| Maximum | 21.29 | 25.85 | 12.54 | 20.83 | 784.94 | 18.98 |
| Alemtuzumab | 0.1 | 18.25 | 96.85 | 15.24 | 0.43 | 19.11 | 6.97 |
| 0.3 | 29.42 | 69.15 | 15.24 | 11.37 | 93.80 | 6.07 |
| 1 | 34.54 | 81.96 | 10.75 | 28.50 | 116.90 | 14.32 |
| 3 | 38.64 | 136.04 | 15.24 | 231.25 | 271.91 | 19.91 |
| Maximum | 38.64 | 136.04 | 15.24 | 231.25 | 271.91 | 19.91 |
| Anti-human CD3 mAb | 0.1 | 2163.39 | 6084.73 | 1080.11 | 2653.47 | 19072.87 | 2230.79 |
| 0.3 | 4153.27 | 6535.38 | 2601.79 | 4097.05 | 25237.08 | 6514.63 |
| 1 | 4013.14 | 8016.42 | 1641.72 | 7250.21 | 33882.46 | 7825.21 |
| 3 | 1175.31 | 8420.57 | 2662.33 | 17172.20 | 36184.04 | 4972.63 |
| Maximum | 4153.27 | 8420.57 | 2662.33 | 17172.20 | 36184.04 | 7825.21 |
| Anti-human CD28 SA mAb | 0.1 | 308.99 | 32.83 | 8.44 | 2.84 | 107.93 | 63.82 |
| 0.3 | 12937.04 | 1997.30 | 947.97 | 2456.97 | 48404.96 | 5631.33 |
| 1 | 61610.45 | 12507.18 | 6288.03 | 74072.79 | 230626.29 | 28257.98 |
| 3 | 133046.50 | 29929.86 | 29934.34 | 272171.74 | 494839.26 | 46222.06 |
| Maximum | 133046.50 | 29929.86 | 29934.34 | 272171.74 | 494839.26 | 46222.06 |
| PBS | 0 | 1.64 | 3.20 | 0.25 | 0.48 | 2.45 | 7.21 |
| Human IgG1 Ab | 0.1 | 4.33 | 9.32 | 5.46 | 0.00 | 8.54 | 6.07 |
| 0.3 | 10.24 | 12.92 | 8.97 | 17.98 | 159.76 | 31.21 |
| 1 | 14.23 | 23.05 | 9.86 | 99.40 | 552.48 | 54.12 |
| 3 | 17.25 | 23.98 | 44.00 | 75.50 | 758.71 | 35.00 |
| Maximum | 17.25 | 23.98 | 44.00 | 99.40 | 758.71 | 54.12 |
| Human IgG2 Ab | 0.1 | 12.91 | 0.00 | 0.00 | 2.33 | 12.66 | 10.61 |
| 0.3 | 11.09 | 1.87 | 1.52 | 16.75 | 399.69 | 43.95 |
| 1 | 18.39 | 6.32 | 0.32 | 2.20 | 433.63 | 143.50 |
| 3 | 23.90 | 14.95 | 3.43 | 23.85 | 689.92 | 254.24 |
| Maximum | 23.90 | 14.95 | 3.43 | 23.85 | 689.92 | 254.24 |
| Mouse IgG1 Ab | 0.1 | 7.47 | 11.69 | 0.64 | 0.00 | 11.84 | 15.11 |
| 0.3 | 17.47 | 0.00 | 0.28 | 1.18 | 43.63 | 43.95 |
| 1 | 16.56 | 8.50 | 0.46 | 4.26 | 138.30 | 96.39 |
| 3 | 11.09 | 14.95 | 3.04 | 130.42 | 332.91 | 93.67 |
| Maximum | 17.47 | 14.95 | 3.04 | 130.42 | 332.91 | 96.39 |
| Mouse IgG2a Ab | 0.1 | 16.56 | 0.00 | 0.00 | 0.84 | 15.13 | 9.71 |
| 0.3 | 16.56 | 12.81 | 0.00 | 0.00 | 247.02 | 233.35 |
| 1 | 16.56 | 12.81 | 0.73 | 22.08 | 729.71 | 323.32 |
| 3 | 25.74 | 6.32 | 0.82 | 31.62 | 210.91 | 384.27 |
| Maximum | 25.74 | 12.81 | 0.82 | 31.62 | 729.71 | 384.27 |
| LPS | 5* | 2253.52 | 570.09 | 252.59 | 515.09 | 2118.42 | 311.85 |
| PHA | 5* | 14287.38 | 14522.84 | 5615.25 | 17689.23 | 35073.56 | 1319.63 |

Table S1. Cytokine release from human PBMC induced by various immobilized antibodies under non-HDC conditions (continued).

| **IL-2 (pg/mL)** |  | Donor | | | | | |
| --- | --- | --- | --- | --- | --- | --- | --- |
| Test article | Concentration (μg/well) | Donor 1 | Donor 2 | Donor 3 | Donor 4 | Donor 5 | Donor 6 |
| Panitumumab | 0.1 | 7.36 | 7.62 | 1.06 | 3.57 | 13.10 | 0.47 |
| 0.3 | 9.76 | 7.62 | 1.06 | 5.92 | 18.50 | 10.93 |
| 1 | 0.00 | 16.45 | 1.49 | 3.72 | 13.72 | 4.46 |
| 3 | 0.00 | 12.57 | 1.17 | 11.45 | 10.58 | 0.00 |
| Maximum | 9.76 | 16.45 | 1.49 | 11.45 | 18.50 | 10.93 |
| Trastuzumab | 0.1 | 8.24 | 2.92 | 1.48 | 11.68 | 9.27 | 0.00 |
| 0.3 | 6.51 | 0.00 | 3.43 | 12.37 | 6.15 | 0.00 |
| 1 | 4.77 | 0.00 | 0.00 | 13.07 | 3.80 | 1.84 |
| 3 | 4.77 | 0.00 | 0.00 | 11.33 | 11.61 | 0.00 |
| Maximum | 8.24 | 2.92 | 3.43 | 13.07 | 11.61 | 1.84 |
| Rituximab | 0.1 | 7.81 | 0.00 | 0.00 | 8.90 | 7.32 | 0.00 |
| 0.3 | 1.72 | 1.18 | 0.00 | 10.28 | 10.83 | 0.00 |
| 1 | 3.90 | 0.00 | 0.00 | 10.28 | 6.54 | 0.00 |
| 3 | 2.15 | 0.00 | 0.99 | 15.17 | 4.19 | 0.00 |
| Maximum | 7.81 | 1.18 | 0.99 | 15.17 | 10.83 | 0.00 |
| Alemtuzumab | 0.1 | 7.37 | 0.00 | 1.48 | 13.07 | 11.61 | 0.00 |
| 0.3 | 5.64 | 0.00 | 0.48 | 7.86 | 14.72 | 0.00 |
| 1 | 2.59 | 0.00 | 0.00 | 8.21 | 5.37 | 0.00 |
| 3 | 1.28 | 0.00 | 0.99 | 10.28 | 3.80 | 0.00 |
| Maximum | 7.37 | 0.00 | 1.48 | 13.07 | 14.72 | 0.00 |
| Anti-human CD3 mAb | 0.1 | 13.26 | 27.83 | 20.71 | 12.61 | 26.95 | 29.12 |
| 0.3 | 16.66 | 25.02 | 25.93 | 22.29 | 20.23 | 47.64 |
| 1 | 24.32 | 18.37 | 26.16 | 11.94 | 16.14 | 58.78 |
| 3 | 14.40 | 14.52 | 25.69 | 3.92 | 5.86 | 40.24 |
| Maximum | 24.32 | 27.83 | 26.16 | 22.29 | 26.95 | 58.78 |
| Anti-human CD28 SA mAb | 0.1 | 63.25 | 49.91 | 25.41 | 6.77 | 36.01 | 37.74 |
| 0.3 | 357.12 | 545.87 | 142.55 | 310.05 | 1071.09 | 1445.70 |
| 1 | 5770.90 | 2458.60 | 817.48 | 2906.80 | 11824.13 | 9511.40 |
| 3 | 10504.87 | 6988.10 | 1691.57 | 10042.75 | 25569.23 | 15291.44 |
| Maximum | 10504.87 | 6988.10 | 1691.57 | 10042.75 | 25569.23 | 15291.44 |
| PBS | 0 | 4.38 | 7.08 | 2.24 | 4.26 | 10.56 | 15.62 |
| Human IgG1 Ab | 0.1 | 6.94 | 0.00 | 0.00 | 11.68 | 11.61 | 5.12 |
| 0.3 | 5.21 | 0.00 | 1.48 | 10.98 | 6.93 | 0.66 |
| 1 | 4.34 | 0.00 | 0.00 | 12.72 | 13.16 | 0.00 |
| 3 | 2.59 | 0.00 | 0.00 | 11.68 | 11.61 | 0.00 |
| Maximum | 6.94 | 0.00 | 1.48 | 12.72 | 13.16 | 5.12 |
| Human IgG2 Ab | 0.1 | 0.73 | 9.61 | 2.65 | 9.11 | 13.72 | 10.93 |
| 0.3 | 4.86 | 6.61 | 4.22 | 9.11 | 19.66 | 23.94 |
| 1 | 9.76 | 8.62 | 1.85 | 6.51 | 8.61 | 13.18 |
| 3 | 9.76 | 9.12 | 3.59 | 8.09 | 9.93 | 8.06 |
| Maximum | 9.76 | 9.61 | 4.22 | 9.11 | 19.66 | 23.94 |
| Mouse IgG1 Ab | 0.1 | 6.12 | 11.89 | 2.87 | 2.73 | 9.93 | 13.18 |
| 0.3 | 11.53 | 9.61 | 1.56 | 4.80 | 16.73 | 4.46 |
| 1 | 3.56 | 11.10 | 0.85 | 5.59 | 9.93 | 12.06 |
| 3 | 2.89 | 10.11 | 3.05 | 11.41 | 15.54 | 14.28 |
| Maximum | 11.53 | 11.89 | 3.05 | 11.41 | 16.73 | 14.28 |
| Mouse IgG2a Ab | 0.1 | 7.36 | 8.12 | 1.06 | 3.26 | 19.08 | 20.24 |
| 0.3 | 9.76 | 14.52 | 1.63 | 4.56 | 18.50 | 6.29 |
| 1 | 11.53 | 13.54 | 1.78 | 13.28 | 9.93 | 6.29 |
| 3 | 4.86 | 9.12 | 0.99 | 9.48 | 17.33 | 1.20 |
| Maximum | 11.53 | 14.52 | 1.78 | 13.28 | 19.08 | 20.24 |
| LPS | 5* | 11.16 | 6.97 | 2.65 | 5.14 | 3.86 | 7.51 |
| PHA | 5* | 790.33 | 536.49 | 319.46 | 367.65 | 636.47 | 483.20 |

Table S1. Cytokine release from human PBMC induced by various immobilized antibodies under non-HDC conditions (continued).

| **IL-6 (pg/mL)** |  | Donor | | | | | |
| --- | --- | --- | --- | --- | --- | --- | --- |
| Test article | Concentration (μg/well) | Donor 1 | Donor 2 | Donor 3 | Donor 4 | Donor 5 | Donor 6 |
| Panitumumab | 0.1 | 35.01 | 29.16 | 17.53 | 22.83 | 109.24 | 315.72 |
| 0.3 | 37.64 | 59.48 | 47.55 | 38.04 | 152.35 | 567.81 |
| 1 | 56.56 | 71.95 | 96.70 | 109.75 | 175.85 | 1028.42 |
| 3 | 42.81 | 94.51 | 217.25 | 316.53 | 166.86 | 912.99 |
| Maximum | 56.56 | 94.51 | 217.25 | 316.53 | 175.85 | 1028.42 |
| Trastuzumab | 0.1 | 83.36 | 69.63 | 307.47 | 250.64 | 419.47 | 471.12 |
| 0.3 | 143.27 | 159.27 | 619.70 | 1072.32 | 1456.63 | 4994.24 |
| 1 | 206.87 | 193.39 | 770.15 | 1640.43 | 2002.67 | 5969.25 |
| 3 | 216.13 | 285.91 | 1332.84 | 2226.23 | 1651.78 | 5598.77 |
| Maximum | 216.13 | 285.91 | 1332.84 | 2226.23 | 2002.67 | 5969.25 |
| Rituximab | 0.1 | 51.13 | 70.50 | 240.74 | 214.94 | 429.55 | 1343.20 |
| 0.3 | 137.49 | 122.44 | 456.09 | 479.24 | 1701.94 | 2524.30 |
| 1 | 133.34 | 199.72 | 533.25 | 1592.13 | 3621.86 | 8375.85 |
| 3 | 102.84 | 141.93 | 377.57 | 631.58 | 1530.16 | 2753.34 |
| Maximum | 137.49 | 199.72 | 533.25 | 1592.13 | 3621.86 | 8375.85 |
| Alemtuzumab | 0.1 | 39.46 | 38.60 | 118.23 | 80.81 | 57.46 | 73.77 |
| 0.3 | 165.90 | 176.15 | 273.63 | 1021.96 | 1270.93 | 682.85 |
| 1 | 285.36 | 513.23 | 366.48 | 2257.91 | 2056.67 | 2019.79 |
| 3 | 420.36 | 522.55 | 1257.81 | 4482.58 | 2597.03 | 3796.92 |
| Maximum | 420.36 | 522.55 | 1257.81 | 4482.58 | 2597.03 | 3796.92 |
| Anti-human CD3 mAb | 0.1 | 140.77 | 147.26 | 216.06 | 174.59 | 175.55 | 265.05 |
| 0.3 | 180.06 | 143.39 | 395.00 | 366.27 | 477.41 | 1031.18 |
| 1 | 103.67 | 259.44 | 410.05 | 360.86 | 952.79 | 2693.23 |
| 3 | 172.60 | 343.27 | 611.90 | 1093.01 | 1070.82 | 3150.76 |
| Maximum | 180.06 | 343.27 | 611.90 | 1093.01 | 1070.82 | 3150.76 |
| Anti-human CD28 SA mAb | 0.1 | 87.95 | 39.17 | 50.45 | 31.44 | 76.57 | 162.09 |
| 0.3 | 241.09 | 260.37 | 165.08 | 234.41 | 779.46 | 3725.05 |
| 1 | 1556.18 | 461.30 | 600.67 | 1001.38 | 3015.23 | 4967.72 |
| 3 | 2110.22 | 982.64 | 1635.52 | 5034.29 | 5520.09 | 7134.95 |
| Maximum | 2110.22 | 982.64 | 1635.52 | 5034.29 | 5520.09 | 7134.95 |
| PBS | 0 | 8.96 | 10.92 | 36.85 | 70.87 | 46.12 | 288.76 |
| Human IgG1 Ab | 0.1 | 64.03 | 41.09 | 86.92 | 49.19 | 125.89 | 120.81 |
| 0.3 | 182.87 | 166.26 | 398.74 | 450.17 | 1728.36 | 3498.08 |
| 1 | 535.78 | 274.98 | 2047.78 | 3718.66 | 3383.08 | 8602.91 |
| 3 | 522.22 | 929.56 | 4870.16 | 5368.27 | 4649.44 | 8310.68 |
| Maximum | 535.78 | 929.56 | 4870.16 | 5368.27 | 4649.44 | 8602.91 |
| Human IgG2 Ab | 0.1 | 35.45 | 23.63 | 17.80 | 162.81 | 54.96 | 107.73 |
| 0.3 | 57.78 | 59.91 | 39.47 | 60.46 | 464.71 | 1728.85 |
| 1 | 109.93 | 131.28 | 356.25 | 229.13 | 1667.33 | 6381.74 |
| 3 | 156.47 | 181.58 | 1184.68 | 1330.64 | 2484.98 | 8223.33 |
| Maximum | 156.47 | 181.58 | 1184.68 | 1330.64 | 2484.98 | 8223.33 |
| Mouse IgG1 Ab | 0.1 | 24.61 | 13.57 | 36.98 | 33.65 | 70.58 | 440.30 |
| 0.3 | 47.46 | 44.64 | 232.47 | 133.50 | 480.05 | 2832.49 |
| 1 | 189.83 | 89.08 | 337.01 | 610.51 | 1032.37 | 7197.32 |
| 3 | 158.20 | 138.07 | 525.79 | 2579.30 | 2974.67 | 7193.49 |
| Maximum | 189.83 | 138.07 | 525.79 | 2579.30 | 2974.67 | 7197.32 |
| Mouse IgG2a Ab | 0.1 | 33.69 | 20.49 | 90.87 | 118.00 | 79.54 | 362.32 |
| 0.3 | 71.74 | 97.58 | 247.70 | 233.53 | 1034.78 | 6673.62 |
| 1 | 134.77 | 97.58 | 325.93 | 631.03 | 1725.20 | 8806.17 |
| 3 | 167.14 | 267.84 | 1119.81 | 2774.16 | 2520.35 | 9054.62 |
| Maximum | 167.14 | 267.84 | 1119.81 | 2774.16 | 2520.35 | 9054.62 |
| LPS | 5* | 3268.97 | 7415.18 | 6871.65 | 9885.03 | 6124.30 | 6892.96 |
| PHA | 5* | 3273.40 | 5555.94 | 7534.66 | 9387.28 | 6407.86 | 5862.59 |

Table S1. Cytokine release from human PBMC induced by various immobilized antibodies under non-HDC conditions (continued).

| **IL-8 (pg/mL)** |  | Donor | | | | | |
| --- | --- | --- | --- | --- | --- | --- | --- |
| Test article | Concentration (μg/well) | Donor 1 | Donor 2 | Donor 3 | Donor 4 | Donor 5 | Donor 6 |
| Panitumumab | 0.1 | 10488.55 | 8143.83 | 5679.23 | 7786.63 | 20206.29 | 23093.46 |
| 0.3 | 11808.05 | 10787.57 | 6944.35 | 11741.41 | 26164.52 | 36521.40 |
| 1 | 12831.07 | 12378.22 | 9581.39 | 28169.45 | 30989.99 | 50678.33 |
| 3 | 11786.02 | 17575.23 | 15430.95 | 51006.48 | 28668.22 | 44538.61 |
| Maximum | 12831.07 | 17575.23 | 15430.95 | 51006.48 | 30989.99 | 50678.33 |
| Trastuzumab | 0.1 | 29410.81 | 44491.80 | 33017.79 | 56892.58 | 61040.59 | 33327.01 |
| 0.3 | 56632.56 | 83269.47 | 38156.74 | 91395.38 | 77249.09 | 84961.34 |
| 1 | 58127.73 | 87471.94 | 54157.14 | 86368.59 | 87383.29 | 87695.84 |
| 3 | 45109.13 | 87791.43 | 68693.97 | 81667.92 | 87135.70 | 91327.54 |
| Maximum | 58127.73 | 87791.43 | 68693.97 | 91395.38 | 87383.29 | 91327.54 |
| Rituximab | 0.1 | 20634.38 | 33546.58 | 26709.09 | 39194.54 | 45268.51 | 41593.48 |
| 0.3 | 36796.02 | 67276.90 | 32830.50 | 78859.59 | 78201.13 | 58324.32 |
| 1 | 39261.55 | 81753.48 | 40020.40 | 76765.80 | 83318.51 | 85780.66 |
| 3 | 40395.79 | 78798.28 | 31141.55 | 85901.25 | 71597.92 | 73436.26 |
| Maximum | 40395.79 | 81753.48 | 40020.40 | 85901.25 | 83318.51 | 85780.66 |
| Alemtuzumab | 0.1 | 20761.38 | 26932.40 | 15723.79 | 17051.50 | 24811.26 | 11875.32 |
| 0.3 | 52602.77 | 75354.83 | 29878.31 | 85893.79 | 73585.24 | 32652.55 |
| 1 | 43283.79 | 76183.74 | 36308.07 | 84626.23 | 78644.08 | 56649.30 |
| 3 | 56296.44 | 84874.05 | 51419.02 | 108899.21 | 80531.75 | 71311.75 |
| Maximum | 56296.44 | 84874.05 | 51419.02 | 108899.21 | 80531.75 | 71311.75 |
| Anti-human CD3 mAb | 0.1 | 9056.84 | 9608.98 | 21051.74 | 34346.89 | 31834.51 | 28727.62 |
| 0.3 | 15317.01 | 11012.20 | 32946.68 | 54937.94 | 36359.17 | 34362.27 |
| 1 | 18556.42 | 23994.90 | 28618.33 | 64436.40 | 57852.78 | 64518.12 |
| 3 | 23351.19 | 31416.72 | 39629.32 | 76330.00 | 75327.13 | 67955.25 |
| Maximum | 23351.19 | 31416.72 | 39629.32 | 76330.00 | 75327.13 | 67955.25 |
| Anti-human CD28 SA mAb | 0.1 | 15260.05 | 13543.76 | 10088.28 | 11148.20 | 21289.32 | 19431.87 |
| 0.3 | 29922.95 | 53432.47 | 23865.59 | 95101.80 | 83804.63 | 80438.74 |
| 1 | 31557.94 | 56371.68 | 32629.29 | 123873.63 | 84658.58 | 83668.81 |
| 3 | 24603.18 | 71898.30 | 41515.97 | 129305.06 | 83890.90 | 80510.14 |
| Maximum | 31557.94 | 71898.30 | 41515.97 | 129305.06 | 84658.58 | 83668.81 |
| PBS | 0 | 2032.99 | 1151.53 | 1961.69 | 2632.11 | 2502.56 | 5968.12 |
| Human IgG1 Ab | 0.1 | 25721.94 | 15717.02 | 14057.00 | 11509.89 | 25169.69 | 17740.14 |
| 0.3 | 44337.37 | 59166.59 | 33804.65 | 76673.47 | 71935.80 | 70391.62 |
| 1 | 54446.69 | 72381.41 | 68294.96 | 107591.77 | 85768.73 | 88613.99 |
| 3 | 51457.75 | 84978.65 | 86236.82 | 109255.74 | 97502.49 | 88186.45 |
| Maximum | 54446.69 | 84978.65 | 86236.82 | 109255.74 | 97502.49 | 88613.99 |
| Human IgG2 Ab | 0.1 | 7191.31 | 4140.67 | 5033.88 | 8137.77 | 7449.39 | 11522.02 |
| 0.3 | 12562.69 | 9614.97 | 5507.14 | 11465.84 | 40059.73 | 45896.12 |
| 1 | 19183.96 | 22630.42 | 18247.91 | 36880.61 | 81500.97 | 79608.36 |
| 3 | 21002.11 | 27071.82 | 30472.43 | 84612.64 | 82721.25 | 82945.99 |
| Maximum | 21002.11 | 27071.82 | 30472.43 | 84612.64 | 82721.25 | 82945.99 |
| Mouse IgG1 Ab | 0.1 | 8018.08 | 4451.51 | 6083.87 | 10362.92 | 14184.86 | 22278.10 |
| 0.3 | 11402.03 | 7800.75 | 14055.52 | 23117.85 | 41818.39 | 59566.85 |
| 1 | 16446.84 | 12703.46 | 14160.70 | 65122.60 | 61062.30 | 77021.58 |
| 3 | 14102.54 | 18022.69 | 17299.47 | 89422.98 | 87954.58 | 82178.89 |
| Maximum | 16446.84 | 18022.69 | 17299.47 | 89422.98 | 87954.58 | 82178.89 |
| Mouse IgG2a Ab | 0.1 | 13167.45 | 5588.17 | 8191.32 | 10162.73 | 15823.16 | 19013.26 |
| 0.3 | 14846.65 | 17979.96 | 15619.37 | 31660.34 | 65049.93 | 73078.18 |
| 1 | 18647.52 | 16762.41 | 16420.00 | 59918.48 | 81442.92 | 68690.75 |
| 3 | 19160.97 | 23890.30 | 30040.75 | 82030.58 | 83335.29 | 86857.73 |
| Maximum | 19160.97 | 23890.30 | 30040.75 | 82030.58 | 83335.29 | 86857.73 |
| LPS | 5* | 15404.87 | 38043.70 | 28135.10 | 57672.06 | 40072.75 | 34389.29 |
| PHA | 5* | 13013.54 | 21131.84 | 27504.79 | 59760.77 | 29933.06 | 30353.74 |

Table S1. Cytokine release from human PBMC induced by various immobilized antibodies under non-HDC conditions (continued).

| **IL-10 (pg/mL)** |  | Donor | | | | | |
| --- | --- | --- | --- | --- | --- | --- | --- |
| Test article | Concentration (μg/well) | Donor 1 | Donor 2 | Donor 3 | Donor 4 | Donor 5 | Donor 6 |
| Panitumumab | 0.1 | 10.91 | 13.90 | 0.93 | 6.14 | 8.41 | 0.00 |
| 0.3 | 5.19 | 17.90 | 1.06 | 6.00 | 15.05 | 4.01 |
| 1 | 5.82 | 19.91 | 0.32 | 6.00 | 9.75 | 0.00 |
| 3 | 7.09 | 15.89 | 1.27 | 7.72 | 10.41 | 4.01 |
| Maximum | 10.91 | 19.91 | 1.27 | 7.72 | 15.05 | 4.01 |
| Trastuzumab | 0.1 | 8.84 | 15.02 | 5.83 | 16.70 | 14.03 | 9.22 |
| 0.3 | 9.44 | 4.38 | 0.94 | 19.35 | 15.49 | 29.58 |
| 1 | 10.04 | 6.21 | 7.40 | 22.70 | 24.30 | 39.47 |
| 3 | 8.84 | 5.30 | 11.28 | 23.37 | 15.49 | 38.71 |
| Maximum | 10.04 | 15.02 | 11.28 | 23.37 | 24.30 | 39.47 |
| Rituximab | 0.1 | 7.65 | 4.38 | 5.83 | 18.02 | 6.11 | 13.71 |
| 0.3 | 10.04 | 8.00 | 7.40 | 14.07 | 18.41 | 16.72 |
| 1 | 10.04 | 4.38 | 8.96 | 20.69 | 33.21 | 51.71 |
| 3 | 8.25 | 2.52 | 4.24 | 13.41 | 21.35 | 18.22 |
| Maximum | 10.04 | 8.00 | 8.96 | 20.69 | 33.21 | 51.71 |
| Alemtuzumab | 0.1 | 10.04 | 5.30 | 2.62 | 5.77 | 2.59 | 4.03 |
| 0.3 | 10.04 | 4.38 | 0.94 | 12.11 | 11.13 | 6.25 |
| 1 | 7.65 | 2.52 | 0.94 | 20.69 | 19.15 | 12.21 |
| 3 | 12.48 | 6.21 | 8.96 | 42.64 | 24.30 | 25.78 |
| Maximum | 12.48 | 6.21 | 8.96 | 42.64 | 24.30 | 25.78 |
| Anti-human CD3 mAb | 0.1 | 1424.44 | 2162.62 | 601.30 | 1787.78 | 1179.50 | 915.01 |
| 0.3 | 1835.75 | 2894.21 | 994.17 | 2453.66 | 4026.29 | 2764.20 |
| 1 | 752.07 | 1898.56 | 416.40 | 3621.95 | 2688.93 | 2048.49 |
| 3 | 210.21 | 1085.58 | 467.52 | 2124.06 | 1530.00 | 958.38 |
| Maximum | 1835.75 | 2894.21 | 994.17 | 3621.95 | 4026.29 | 2764.20 |
| Anti-human CD28 SA mAb | 0.1 | 12.19 | 12.57 | 3.15 | 6.29 | 14.39 | 11.43 |
| 0.3 | 117.88 | 78.91 | 15.33 | 71.02 | 150.38 | 232.32 |
| 1 | 501.03 | 254.02 | 59.93 | 404.28 | 987.69 | 746.54 |
| 3 | 814.71 | 607.02 | 169.15 | 730.95 | 994.59 | 1093.30 |
| Maximum | 814.71 | 607.02 | 169.15 | 730.95 | 994.59 | 1093.30 |
| PBS | 0 | 2.10 | 7.03 | 1.84 | 7.00 | 7.17 | 19.19 |
| Human IgG1 Ab | 0.1 | 10.04 | 12.42 | 5.83 | 7.64 | 1.21 | 6.25 |
| 0.3 | 13.71 | 11.54 | 5.04 | 12.76 | 25.78 | 16.72 |
| 1 | 13.71 | 8.00 | 8.96 | 35.68 | 41.44 | 54.78 |
| 3 | 12.48 | 9.78 | 25.71 | 50.38 | 47.45 | 50.18 |
| Maximum | 13.71 | 12.42 | 25.71 | 50.38 | 47.45 | 54.78 |
| Human IgG2 Ab | 0.1 | 4.57 | 5.99 | 0.79 | 9.80 | 15.05 | 2.99 |
| 0.3 | 4.57 | 0.87 | 1.48 | 16.16 | 20.96 | 12.31 |
| 1 | 5.82 | 7.95 | 2.59 | 9.46 | 28.76 | 37.62 |
| 3 | 13.48 | 13.23 | 5.81 | 15.77 | 34.59 | 51.49 |
| Maximum | 13.48 | 13.23 | 5.81 | 16.16 | 34.59 | 51.49 |
| Mouse IgG1 Ab | 0.1 | 10.27 | 11.53 | 0.92 | 5.41 | 12.41 | 1.92 |
| 0.3 | 7.09 | 11.91 | 2.38 | 7.01 | 15.71 | 24.89 |
| 1 | 9.63 | 16.56 | 2.80 | 15.90 | 26.17 | 53.01 |
| 3 | 3.32 | 4.69 | 2.59 | 27.19 | 39.75 | 51.49 |
| Maximum | 10.27 | 16.56 | 2.80 | 27.19 | 39.75 | 53.01 |
| Mouse IgG2a Ab | 0.1 | 12.19 | 9.92 | 0.58 | 8.70 | 11.08 | 11.43 |
| 0.3 | 5.82 | 21.92 | 1.75 | 8.90 | 20.30 | 42.29 |
| 1 | 5.19 | 7.95 | 1.75 | 15.06 | 34.59 | 53.01 |
| 3 | 13.48 | 18.57 | 4.65 | 24.47 | 33.30 | 53.01 |
| Maximum | 13.48 | 21.92 | 4.65 | 24.47 | 34.59 | 53.01 |
| LPS | 5* | 179.02 | 767.84 | 311.28 | 1133.19 | 929.04 | 654.37 |
| PHA | 5* | 1194.93 | 1345.85 | 582.70 | 2196.81 | 1952.53 | 1871.34 |

Table S1. Cytokine release from human PBMC induced by various immobilized antibodies under non-HDC conditions (continued).

| **MIP-1α (pg/mL)** |  | Donor | | | | | |
| --- | --- | --- | --- | --- | --- | --- | --- |
| Test article | Concentration (μg/well) | Donor 1 | Donor 2 | Donor 3 | Donor 4 | Donor 5 | Donor 6 |
| Panitumumab | 0.1 | 2055.09 | 1471.24 | 321.46 | 171.02 | 2434.42 | 1358.87 |
| 0.3 | 2179.49 | 2604.84 | 1162.97 | 563.88 | 3576.56 | 2017.61 |
| 1 | 2579.98 | 3258.90 | 2390.18 | 3530.97 | 3945.70 | 2208.02 |
| 3 | 2266.75 | 2918.47 | 3656.54 | 9342.93 | 3632.71 | 2245.53 |
| Maximum | 2579.98 | 3258.90 | 3656.54 | 9342.93 | 3945.70 | 2245.53 |
| Trastuzumab | 0.1 | 3469.20 | 5120.47 | 7139.64 | 4894.97 | 4761.00 | 1086.68 |
| 0.3 | 5737.89 | 10265.72 | 10076.53 | 15379.60 | 6866.80 | 1997.96 |
| 1 | 6219.43 | 11051.29 | 10618.28 | 17707.19 | 7877.74 | 2061.35 |
| 3 | 5558.66 | 12935.69 | 10853.41 | 16267.11 | 7519.39 | 2058.35 |
| Maximum | 6219.43 | 12935.69 | 10853.41 | 17707.19 | 7877.74 | 2061.35 |
| Rituximab | 0.1 | 3041.76 | 3855.44 | 4659.14 | 1845.53 | 3566.66 | 1484.96 |
| 0.3 | 5973.31 | 6852.92 | 5741.56 | 6621.79 | 6266.51 | 1540.38 |
| 1 | 5487.62 | 13536.69 | 6857.76 | 15491.88 | 11603.08 | 3662.67 |
| 3 | 5231.46 | 10342.43 | 4832.96 | 12620.80 | 5700.68 | 1573.92 |
| Maximum | 5973.31 | 13536.69 | 6857.76 | 15491.88 | 11603.08 | 3662.67 |
| Alemtuzumab | 0.1 | 1605.83 | 1269.32 | 1390.13 | 155.46 | 1206.79 | 85.71 |
| 0.3 | 5474.66 | 4169.72 | 4004.13 | 6898.83 | 4198.63 | 739.00 |
| 1 | 4968.51 | 6026.69 | 4800.26 | 13701.38 | 6213.02 | 1667.88 |
| 3 | 5347.04 | 7027.87 | 6655.36 | 17337.28 | 6007.89 | 2037.21 |
| Maximum | 5474.66 | 7027.87 | 6655.36 | 17337.28 | 6213.02 | 2037.21 |
| Anti-human CD3 mAb | 0.1 | 2215.97 | 3297.08 | 5814.51 | 7213.97 | 4800.77 | 1264.43 |
| 0.3 | 4277.72 | 4610.81 | 8916.22 | 16727.08 | 7505.77 | 4039.30 |
| 1 | 5028.69 | 13343.15 | 9900.39 | 17915.34 | 13063.06 | 4670.79 |
| 3 | 4508.33 | 14357.04 | 9839.23 | 20075.96 | 14354.95 | 4325.47 |
| Maximum | 5028.69 | 14357.04 | 9900.39 | 20075.96 | 14354.95 | 4670.79 |
| Anti-human CD28 SA mAb | 0.1 | 1818.61 | 2006.25 | 1419.29 | 319.54 | 2118.52 | 898.23 |
| 0.3 | 3039.89 | 7689.49 | 5399.68 | 15808.34 | 6334.21 | 2871.95 |
| 1 | 6912.91 | 7736.45 | 10131.44 | 22519.13 | 10454.59 | 4345.41 |
| 3 | 10968.90 | 14075.01 | 13006.63 | 39802.94 | 18206.96 | 5156.40 |
| Maximum | 10968.90 | 14075.01 | 13006.63 | 39802.94 | 18206.96 | 5156.40 |
| PBS | 0 | 31.31 | 24.81 | 119.79 | 58.54 | 80.09 | 203.82 |
| Human IgG1 Ab | 0.1 | 3275.48 | 1800.93 | 1706.49 | 305.60 | 1786.20 | 673.40 |
| 0.3 | 5762.14 | 8479.52 | 5773.15 | 10209.55 | 5033.61 | 1964.71 |
| 1 | 5153.19 | 6250.99 | 10456.88 | 17709.87 | 6462.02 | 2232.29 |
| 3 | 5297.12 | 8673.28 | 14863.29 | 18215.85 | 7822.92 | 2147.95 |
| Maximum | 5762.14 | 8673.28 | 14863.29 | 18215.85 | 7822.92 | 2232.29 |
| Human IgG2 Ab | 0.1 | 127.01 | 61.89 | 254.26 | 165.21 | 256.69 | 244.02 |
| 0.3 | 1318.91 | 1040.29 | 325.15 | 478.05 | 3225.44 | 1297.65 |
| 1 | 2514.00 | 3045.84 | 3286.13 | 1635.50 | 5749.19 | 3512.49 |
| 3 | 3407.05 | 4295.84 | 7489.65 | 15630.46 | 9563.51 | 3716.10 |
| Maximum | 3407.05 | 4295.84 | 7489.65 | 15630.46 | 9563.51 | 3716.10 |
| Mouse IgG1 Ab | 0.1 | 471.84 | 578.98 | 487.12 | 318.60 | 966.96 | 729.92 |
| 0.3 | 1398.44 | 995.70 | 1929.65 | 2532.75 | 3874.52 | 2029.05 |
| 1 | 2113.46 | 2213.68 | 2233.33 | 4409.66 | 4781.50 | 3248.78 |
| 3 | 1759.96 | 2798.36 | 2871.52 | 12480.60 | 6885.52 | 3009.45 |
| Maximum | 2113.46 | 2798.36 | 2871.52 | 12480.60 | 6885.52 | 3248.78 |
| Mouse IgG2a Ab | 0.1 | 2203.73 | 464.99 | 573.38 | 138.17 | 536.54 | 487.94 |
| 0.3 | 3044.70 | 2673.94 | 2135.19 | 1204.14 | 5559.95 | 3601.73 |
| 1 | 3112.84 | 2956.61 | 2358.45 | 3875.00 | 5499.12 | 4412.68 |
| 3 | 3185.19 | 4352.85 | 5143.46 | 12931.38 | 6011.65 | 3074.61 |
| Maximum | 3185.19 | 4352.85 | 5143.46 | 12931.38 | 6011.65 | 4412.68 |
| LPS | 5* | 3774.56 | 8226.16 | 8111.55 | 14455.57 | 7514.17 | 2562.60 |
| PHA | 5* | 7974.57 | 11289.39 | 8312.36 | 18341.46 | 14415.72 | 3924.59 |
| Ab: antibody, mAb: monoclonal antibody, HDC: high-density pre-culture, LPS: lipopolysaccharide, PHA: phytohemagglutinin, SA: super-agonist.  *: Units of concentration for LPS and PHA are g/mL. Each cytokine level was calculated from the standard curve by the usage of BioPlex® system. When the value was not calculated, the value was regarded as “0”. | | | | | | | |

Table S2. Cytokine release from human PBMC induced by various immobilized antibodies under HDC conditions.

| **TNFα (pg/mL)** |  | Donor | | | | | |
| --- | --- | --- | --- | --- | --- | --- | --- |
| Test article | Concentration (μg/well) | Donor 1 | Donor 2 | Donor 3 | Donor 4 | Donor 5 | Donor 6 |
| Panitumumab | 0.1 | 171.43 | 398.23 | 99.87 | 91.37 | 158.22 | 372.82 |
| 0.3 | 268.01 | 424.86 | 68.86 | 393.33 | 375.18 | 424.65 |
| 1 | 521.05 | 1651.16 | 117.65 | 566.76 | 366.79 | 532.96 |
| 3 | 1753.72 | 657.07 | 153.41 | 683.59 | 452.12 | 535.46 |
| Maximum | 1753.72 | 1651.16 | 153.41 | 683.59 | 452.12 | 535.46 |
| Trastuzumab | 0.1 | 402.47 | 1096.69 | 241.60 | 704.60 | 1049.39 | 61.55 |
| 0.3 | 767.56 | 1717.46 | 535.09 | 1691.65 | 2654.10 | 1456.07 |
| 1 | 1209.40 | 2633.57 | 476.18 | 2223.87 | 3493.08 | 1818.24 |
| 3 | 1899.36 | 1678.10 | 833.32 | 2881.74 | 3265.10 | 1529.59 |
| Maximum | 1899.36 | 2633.57 | 833.32 | 2881.74 | 3493.08 | 1818.24 |
| Rituximab | 0.1 | 271.46 | 264.87 | 54.28 | 368.47 | 675.81 | 252.63 |
| 0.3 | 1211.24 | 1163.09 | 223.73 | 746.55 | 1200.41 | 598.62 |
| 1 | 1091.60 | 1823.96 | 619.79 | 1648.17 | 1772.46 | 1312.87 |
| 3 | 1247.10 | 3163.45 | 482.20 | 2128.20 | 2048.55 | 880.50 |
| Maximum | 1247.10 | 3163.45 | 619.79 | 2128.20 | 2048.55 | 1312.87 |
| Alemtuzumab | 0.1 | 341.76 | 1041.42 | 174.49 | 553.17 | 701.79 | 359.22 |
| 0.3 | 1734.70 | 1998.94 | 235.93 | 1664.27 | 1571.46 | 1381.49 |
| 1 | 2501.16 | 4141.54 | 692.74 | 3667.74 | 3412.86 | 2142.74 |
| 3 | 3066.91 | 8655.78 | 793.49 | 7005.79 | 5058.86 | 5863.77 |
| Maximum | 3066.91 | 8655.78 | 793.49 | 7005.79 | 5058.86 | 5863.77 |
| Anti-human CD3 mAb | 0.1 | 5034.58 | 6206.79 | 4784.83 | 3668.94 | 7741.66 | 6871.84 |
| 0.3 | 5440.92 | 11038.83 | 3298.06 | 8989.69 | 13535.94 | 14590.61 |
| 1 | 8757.72 | 10963.08 | 5163.75 | 8963.19 | 15592.88 | 14455.68 |
| 3 | 7263.51 | 10665.70 | 5516.89 | 8213.32 | 13194.56 | 14711.13 |
| Maximum | 8757.72 | 11038.83 | 5516.89 | 8989.69 | 15592.88 | 14711.13 |
| Anti-human CD28 SA mAb | 0.1 | 885.39 | 2044.26 | 184.81 | 131.54 | 942.21 | 834.30 |
| 0.3 | 6074.72 | 9480.67 | 2103.65 | 9025.42 | 11628.34 | 10719.49 |
| 1 | 22996.39 | 27817.24 | 8025.98 | 37690.28 | 42732.01 | 33974.11 |
| 3 | 31856.89 | 27859.69 | 11735.75 | 17358.21 | 46075.94 | 41224.32 |
| Maximum | 31856.89 | 27859.69 | 11735.75 | 37690.28 | 46075.94 | 41224.32 |
| PBS | 0 | 19.50 | 27.37 | 19.82 | 76.74 | 31.56 | 38.73 |
| Human IgG1 Ab | 0.1 | 246.77 | 635.80 | 47.47 | 211.83 | 132.59 | 44.07 |
| 0.3 | 1020.93 | 1313.24 | 207.74 | 1112.04 | 679.00 | 975.23 |
| 1 | 1918.02 | 2228.46 | 427.62 | 3592.00 | 2421.85 | 2097.47 |
| 3 | 2210.98 | 7376.93 | 1277.07 | 4210.58 | 3421.45 | 2195.69 |
| Maximum | 2210.98 | 7376.93 | 1277.07 | 4210.58 | 3421.45 | 2195.69 |
| Human IgG2 Ab | 0.1 | 134.43 | 149.09 | 142.80 | 58.75 | 83.11 | 209.08 |
| 0.3 | 370.54 | 917.77 | 71.12 | 457.07 | 325.22 | 440.46 |
| 1 | 578.54 | 1130.28 | 149.96 | 682.32 | 859.80 | 1405.87 |
| 3 | 601.36 | 1263.88 | 390.67 | 770.69 | 932.00 | 1636.29 |
| Maximum | 601.36 | 1263.88 | 390.67 | 770.69 | 932.00 | 1636.29 |
| Mouse IgG1 Ab | 0.1 | 147.86 | 120.88 | 31.66 | 68.51 | 102.43 | 138.10 |
| 0.3 | 195.77 | 413.11 | 92.20 | 373.85 | 223.49 | 180.24 |
| 1 | 317.71 | 568.61 | 181.09 | 543.14 | 455.40 | 417.46 |
| 3 | 500.51 | 1280.80 | 126.38 | 891.29 | 426.23 | 636.20 |
| Maximum | 500.51 | 1280.80 | 181.09 | 891.29 | 455.40 | 636.20 |
| Mouse IgG2a Ab | 0.1 | 71.67 | 134.13 | 24.78 | 58.43 | 122.49 | 250.20 |
| 0.3 | 268.86 | 858.20 | 179.49 | 316.57 | 391.59 | 581.59 |
| 1 | 431.42 | 1862.38 | 350.19 | 556.10 | 1308.35 | 1313.09 |
| 3 | 768.66 | 3157.35 | 560.59 | 986.93 | 1439.28 | 2164.12 |
| Maximum | 768.66 | 3157.35 | 560.59 | 986.93 | 1439.28 | 2164.12 |
| LPS | 5* | 9720.88 | 7267.51 | 5695.31 | 18455.95 | 8445.08 | 9051.45 |
| PHA | 5* | 6729.62 | 9004.36 | 3467.43 | 10421.67 | 12319.93 | 9177.48 |

Table S2. Cytokine release from human PBMC induced by various immobilized antibodies under HDC conditions (continued).

| **IFNγ (pg/mL)** |  | Donor | | | | | |
| --- | --- | --- | --- | --- | --- | --- | --- |
| Test article | Concentration  (μg/well) | Donor 1 | Donor 2 | Donor 3 | Donor 4 | Donor 5 | Donor 6 |
| Panitumumab | 0.1 | 14.09 | 0.00 | 0.00 | 5.54 | 10.59 | 0.00 |
| 0.3 | 14.09 | 0.00 | 0.00 | 7.50 | 15.93 | 2.52 |
| 1 | 14.09 | 47.52 | 0.00 | 5.54 | 14.15 | 11.13 |
| 3 | 23.34 | 0.00 | 0.00 | 4.07 | 21.27 | 0.00 |
| Maximum | 23.34 | 47.52 | 0.00 | 7.50 | 21.27 | 11.13 |
| Trastuzumab | 0.1 | 19.23 | 136.33 | 17.44 | 41.11 | 57.05 | 11.05 |
| 0.3 | 38.83 | 130.59 | 24.75 | 33.81 | 76.42 | 45.86 |
| 1 | 35.52 | 147.81 | 14.56 | 41.11 | 72.11 | 29.53 |
| 3 | 42.16 | 101.82 | 17.44 | 66.84 | 95.82 | 27.49 |
| Maximum | 42.16 | 147.81 | 24.75 | 66.84 | 95.82 | 45.86 |
| Rituximab | 0.1 | 22.45 | 20.54 | 20.35 | 15.72 | 37.72 | 15.17 |
| 0.3 | 38.83 | 78.74 | 10.30 | 77.93 | 31.29 | 27.49 |
| 1 | 19.23 | 92.21 | 11.71 | 26.54 | 38.53 | 23.39 |
| 3 | 32.23 | 83.48 | 29.20 | 41.11 | 48.45 | 25.44 |
| Maximum | 38.83 | 92.21 | 29.20 | 77.93 | 48.45 | 27.49 |
| Alemtuzumab | 0.1 | 33.87 | 201.26 | 19.31 | 33.81 | 52.75 | 23.39 |
| 0.3 | 52.20 | 258.34 | 17.44 | 50.27 | 42.01 | 33.62 |
| 1 | 58.96 | 349.42 | 20.35 | 55.78 | 95.82 | 72.29 |
| 3 | 89.78 | 1020.92 | 32.19 | 205.29 | 290.74 | 156.20 |
| Maximum | 89.78 | 1020.92 | 32.19 | 205.29 | 290.74 | 156.20 |
| Anti-human CD3 mAb | 0.1 | 5903.28 | 19141.50 | 2921.61 | 10891.00 | 41284.60 | 6049.35 |
| 0.3 | 8259.24 | 25646.70 | 2796.41 | 12444.12 | 49947.27 | 12552.32 |
| 1 | 14420.98 | 37994.66 | 5213.00 | 10261.25 | 70283.98 | 12600.53 |
| 3 | 15507.75 | 40195.35 | 7402.20 | 9011.39 | 63700.01 | 13471.17 |
| Maximum | 15507.75 | 40195.35 | 7402.20 | 12444.12 | 70283.98 | 13471.17 |
| Anti-human CD28 SA mAb | 0.1 | 634.47 | 672.48 | 0.20 | 4.56 | 162.60 | 14.61 |
| 0.3 | 20970.92 | 44650.39 | 2627.03 | 24595.96 | 70823.64 | 14119.14 |
| 1 | 111823.62 | 166851.24 | 23774.68 | 106515.88 | 395087.82 | 92145.66 |
| 3 | 156209.28 | 165638.61 | 32678.21 | 200577.60 | 410077.63 | 139241.28 |
| Maximum | 156209.28 | 166851.24 | 32678.21 | 200577.60 | 410077.63 | 139241.28 |
| PBS | 0 | 3.85 | 3.37 | 0.44 | 23.23 | 2.49 | 1.92 |
| Human IgG1 Ab | 0.1 | 0.00 | 12.67 | 10.30 | 22.92 | 12.06 | 23.39 |
| 0.3 | 28.95 | 36.16 | 13.13 | 33.81 | 20.59 | 25.44 |
| 1 | 62.35 | 43.94 | 20.35 | 33.81 | 67.81 | 27.49 |
| 3 | 40.49 | 214.75 | 37.46 | 87.19 | 42.01 | 41.79 |
| Maximum | 62.35 | 214.75 | 37.46 | 87.19 | 67.81 | 41.79 |
| Human IgG2 Ab | 0.1 | 7.97 | 0.00 | 0.00 | 2.13 | 7.03 | 0.00 |
| 0.3 | 18.71 | 33.56 | 0.00 | 6.03 | 15.93 | 0.00 |
| 1 | 20.25 | 26.57 | 0.00 | 6.27 | 21.27 | 69.34 |
| 3 | 35.77 | 33.56 | 0.00 | 7.25 | 157.23 | 18.10 |
| Maximum | 35.77 | 33.56 | 0.00 | 7.25 | 157.23 | 69.34 |
| Mouse IgG1 Ab | 0.1 | 12.55 | 0.00 | 0.20 | 4.56 | 0.00 | 0.00 |
| 0.3 | 15.63 | 2.03 | 0.00 | 4.81 | 3.48 | 0.83 |
| 1 | 9.49 | 0.00 | 0.00 | 6.03 | 0.00 | 0.00 |
| 3 | 23.34 | 0.00 | 0.00 | 2.61 | 7.03 | 0.00 |
| Maximum | 23.34 | 2.03 | 0.20 | 6.03 | 7.03 | 0.83 |
| Mouse IgG2a Ab | 0.1 | 11.02 | 0.00 | 0.00 | 4.07 | 0.00 | 0.00 |
| 0.3 | 17.16 | 75.40 | 0.00 | 8.48 | 10.59 | 2.52 |
| 1 | 26.44 | 106.72 | 0.00 | 7.01 | 85.59 | 11.13 |
| 3 | 38.89 | 143.23 | 0.00 | 11.44 | 65.91 | 11.13 |
| Maximum | 38.89 | 143.23 | 0.00 | 11.44 | 85.59 | 11.13 |
| LPS | 5* | 2854.28 | 1008.74 | 220.83 | 5897.01 | 13338.23 | 1152.76 |
| PHA | 5* | 40523.75 | 52336.83 | 13033.13 | 84201.00 | 80127.11 | 6706.87 |

Table S2. Cytokine release from human PBMC induced by various immobilized antibodies under HDC conditions (continued).

| **IL-2 (pg/mL)** |  | Donor | | | | | |
| --- | --- | --- | --- | --- | --- | --- | --- |
| Test article | Concentration (μg/well) | Donor 1 | Donor 2 | Donor 3 | Donor 4 | Donor 5 | Donor 6 |
| Panitumumab | 0.1 | 11.53 | 0.52 | 0.00 | 2.65 | 7.41 | 7.57 |
| 0.3 | 12.88 | 0.00 | 0.00 | 1.77 | 9.36 | 0.23 |
| 1 | 8.15 | 13.22 | 0.00 | 0.51 | 14.15 | 8.56 |
| 3 | 11.53 | 2.21 | 0.00 | 0.00 | 10.33 | 5.57 |
| Maximum | 12.88 | 13.22 | 0.00 | 2.65 | 14.15 | 8.56 |
| Trastuzumab | 0.1 | 13.46 | 1.18 | 11.61 | 0.00 | 12.24 | 0.00 |
| 0.3 | 7.38 | 4.08 | 13.88 | 0.00 | 16.06 | 0.00 |
| 1 | 6.61 | 6.96 | 10.09 | 0.00 | 10.95 | 0.00 |
| 3 | 9.67 | 1.18 | 13.88 | 0.00 | 12.24 | 0.00 |
| Maximum | 13.46 | 6.96 | 13.88 | 0.00 | 16.06 | 0.00 |
| Rituximab | 0.1 | 10.43 | 0.00 | 7.04 | 0.00 | 14.80 | 0.00 |
| 0.3 | 4.31 | 4.08 | 8.57 | 0.00 | 12.24 | 3.48 |
| 1 | 2.77 | 6.96 | 11.61 | 0.00 | 6.06 | 5.42 |
| 3 | 3.54 | 0.00 | 14.64 | 0.00 | 14.80 | 0.00 |
| Maximum | 10.43 | 6.96 | 14.64 | 0.00 | 14.80 | 5.42 |
| Alemtuzumab | 0.1 | 8.90 | 6.96 | 0.00 | 0.00 | 22.23 | 0.00 |
| 0.3 | 7.38 | 8.39 | 10.85 | 0.00 | 17.31 | 9.22 |
| 1 | 1.99 | 5.52 | 11.61 | 0.00 | 6.95 | 0.00 |
| 3 | 6.61 | 6.96 | 16.15 | 0.00 | 4.15 | 7.80 |
| Maximum | 8.90 | 8.39 | 16.15 | 0.00 | 22.23 | 9.22 |
| Anti-human CD3 mAb | 0.1 | 21.56 | 23.77 | 64.98 | 12.73 | 50.47 | 20.90 |
| 0.3 | 45.92 | 25.26 | 52.51 | 15.62 | 67.12 | 279.43 |
| 1 | 213.13 | 10.14 | 34.95 | 8.51 | 141.11 | 418.21 |
| 3 | 84.92 | 6.24 | 14.67 | 3.91 | 79.24 | 279.43 |
| Maximum | 213.13 | 25.26 | 64.98 | 15.62 | 141.11 | 418.21 |
| Anti-human CD28 SA mAb | 0.1 | 47.89 | 86.48 | 16.93 | 5.67 | 45.15 | 43.45 |
| 0.3 | 1491.56 | 2641.20 | 515.72 | 1426.78 | 3285.26 | 5138.22 |
| 1 | 19297.14 | 15976.14 | 1891.22 | 6986.90 | 27058.01 | 31329.99 |
| 3 | 25821.64 | 14196.99 | 2700.05 | 12231.54 | 32793.76 | 40548.32 |
| Maximum | 25821.64 | 15976.14 | 2700.05 | 12231.54 | 32793.76 | 40548.32 |
| PBS | 0 | 8.41 | 6.81 | 0.61 | 10.22 | 12.08 | 10.53 |
| Human IgG1 Ab | 0.1 | 10.43 | 9.11 | 11.61 | 0.00 | 27.04 | 0.00 |
| 0.3 | 5.85 | 4.08 | 13.88 | 0.00 | 22.23 | 0.00 |
| 1 | 11.19 | 1.91 | 17.65 | 0.00 | 22.23 | 5.42 |
| 3 | 5.85 | 0.00 | 0.00 | 0.00 | 12.24 | 1.50 |
| Maximum | 11.19 | 9.11 | 17.65 | 0.00 | 27.04 | 5.42 |
| Human IgG2 Ab | 0.1 | 10.86 | 5.45 | 0.00 | 5.93 | 11.29 | 10.51 |
| 0.3 | 8.15 | 3.85 | 0.00 | 0.14 | 8.39 | 14.35 |
| 1 | 10.86 | 6.24 | 0.00 | 0.00 | 10.33 | 19.98 |
| 3 | 14.89 | 3.85 | 0.00 | 0.00 | 8.39 | 4.56 |
| Maximum | 14.89 | 6.24 | 0.00 | 5.93 | 11.29 | 19.98 |
| Mouse IgG1 Ab | 0.1 | 10.86 | 3.85 | 0.39 | 3.22 | 5.43 | 2.47 |
| 0.3 | 10.86 | 7.03 | 0.00 | 2.07 | 16.04 | 0.00 |
| 1 | 12.21 | 0.52 | 0.00 | 1.92 | 12.25 | 4.56 |
| 3 | 8.15 | 2.21 | 0.00 | 1.16 | 10.33 | 12.44 |
| Maximum | 12.21 | 7.03 | 0.39 | 3.22 | 16.04 | 12.44 |
| Mouse IgG2a Ab | 0.1 | 10.18 | 0.00 | 0.00 | 4.05 | 10.33 | 8.56 |
| 0.3 | 6.11 | 0.00 | 0.00 | 1.77 | 8.39 | 10.51 |
| 1 | 7.47 | 2.21 | 0.00 | 0.33 | 15.09 | 16.24 |
| 3 | 9.51 | 7.03 | 0.00 | 2.36 | 15.09 | 0.00 |
| Maximum | 10.18 | 7.03 | 0.00 | 4.05 | 15.09 | 16.24 |
| LPS | 5* | 14.85 | 5.05 | 6.57 | 1.39 | 17.30 | 16.00 |
| PHA | 5* | 2783.01 | 2801.79 | 388.32 | 2427.79 | 4712.07 | 4426.27 |

Table S2. Cytokine release from human PBMC induced by various immobilized antibodies under HDC conditions (continued).

| **IL-6 (pg/mL)** |  | Donor | | | | | |
| --- | --- | --- | --- | --- | --- | --- | --- |
| Test article | Concentration (μg/well) | Donor 1 | Donor 2 | Donor 3 | Donor 4 | Donor 5 | Donor 6 |
| Panitumumab | 0.1 | 1.78 | 0.00 | 29.39 | 4.99 | 5.02 | 0.00 |
| 0.3 | 0.00 | 0.00 | 0.00 | 7.56 | 16.70 | 0.00 |
| 1 | 14.57 | 526.79 | 0.13 | 14.62 | 2.79 | 0.00 |
| 3 | 958.72 | 5.71 | 2.63 | 10.58 | 2.79 | 0.00 |
| Maximum | 958.72 | 526.79 | 29.39 | 14.62 | 16.70 | 0.00 |
| Trastuzumab | 0.1 | 3.64 | 0.00 | 11.92 | 0.00 | 0.00 | 0.00 |
| 0.3 | 2.74 | 2.47 | 47.48 | 0.00 | 17.17 | 16.21 |
| 1 | 11.67 | 352.40 | 0.00 | 0.00 | 23.38 | 22.12 |
| 3 | 13.91 | 167.84 | 9.76 | 1.84 | 17.17 | 38.99 |
| Maximum | 13.91 | 352.40 | 47.48 | 1.84 | 23.38 | 38.99 |
| Rituximab | 0.1 | 0.80 | 0.00 | 0.00 | 0.00 | 34.12 | 0.00 |
| 0.3 | 21.79 | 0.00 | 0.00 | 6.37 | 1.43 | 0.00 |
| 1 | 5.35 | 37.90 | 0.00 | 0.00 | 0.00 | 15.54 |
| 3 | 2.74 | 86.46 | 0.00 | 0.00 | 0.00 | 0.93 |
| Maximum | 21.79 | 86.46 | 0.00 | 6.37 | 34.12 | 15.54 |
| Alemtuzumab | 0.1 | 1.81 | 0.00 | 0.00 | 0.00 | 0.00 | 0.00 |
| 0.3 | 33.30 | 62.37 | 0.00 | 0.00 | 0.00 | 10.76 |
| 1 | 59.89 | 1475.64 | 126.48 | 220.95 | 72.00 | 109.06 |
| 3 | 130.93 | 4251.49 | 114.97 | 756.97 | 212.30 | 1547.59 |
| Maximum | 130.93 | 4251.49 | 126.48 | 756.97 | 212.30 | 1547.59 |
| Anti-human CD3 mAb | 0.1 | 69.36 | 428.08 | 149.09 | 560.43 | 392.43 | 794.78 |
| 0.3 | 87.07 | 581.28 | 57.72 | 190.36 | 446.61 | 949.58 |
| 1 | 121.89 | 1375.71 | 137.83 | 220.17 | 604.76 | 1423.12 |
| 3 | 86.57 | 2008.04 | 212.01 | 273.30 | 537.22 | 1520.37 |
| Maximum | 121.89 | 2008.04 | 212.01 | 560.43 | 604.76 | 1520.37 |
| Anti-human CD28 SA mAb | 0.1 | 60.16 | 39.55 | 7.47 | 7.79 | 3.92 | 0.00 |
| 0.3 | 248.54 | 1021.45 | 96.49 | 324.59 | 741.72 | 702.65 |
| 1 | 1744.17 | 4370.77 | 591.57 | 1369.34 | 4294.41 | 3403.17 |
| 3 | 2221.24 | 3597.56 | 825.79 | 2310.07 | 4795.94 | 3868.36 |
| Maximum | 2221.24 | 4370.77 | 825.79 | 2310.07 | 4795.94 | 3868.36 |
| PBS | 0 | 4.28 | 3.89 | 1.01 | 61.05 | 7.50 | 6.69 |
| Human IgG1 Ab | 0.1 | 3.64 | 0.00 | 0.00 | 0.00 | 0.00 | 0.00 |
| 0.3 | 8.59 | 5.72 | 0.00 | 0.00 | 0.00 | 11.46 |
| 1 | 46.21 | 315.38 | 0.00 | 15.86 | 25.39 | 42.62 |
| 3 | 45.58 | 3037.21 | 41.65 | 27.66 | 105.79 | 59.17 |
| Maximum | 46.21 | 3037.21 | 41.65 | 27.66 | 105.79 | 59.17 |
| Human IgG2 Ab | 0.1 | 5.42 | 1.44 | 131.75 | 12.33 | 0.00 | 0.00 |
| 0.3 | 3.02 | 5.03 | 0.88 | 9.05 | 5.02 | 0.00 |
| 1 | 4.23 | 14.13 | 5.08 | 19.01 | 6.08 | 22.27 |
| 3 | 2.41 | 13.50 | 29.39 | 11.02 | 9.13 | 30.47 |
| Maximum | 5.42 | 14.13 | 131.75 | 19.01 | 9.13 | 30.47 |
| Mouse IgG1 Ab | 0.1 | 23.36 | 0.00 | 0.13 | 5.07 | 0.18 | 0.00 |
| 0.3 | 0.00 | 1.44 | 4.43 | 5.91 | 1.57 | 0.00 |
| 1 | 0.48 | 8.38 | 17.57 | 8.45 | 0.00 | 0.00 |
| 3 | 8.91 | 381.20 | 9.16 | 16.83 | 2.79 | 0.00 |
| Maximum | 23.36 | 381.20 | 17.57 | 16.83 | 2.79 | 0.00 |
| Mouse IgG2a Ab | 0.1 | 1.78 | 0.00 | 0.60 | 9.56 | 0.00 | 0.00 |
| 0.3 | 3.02 | 0.00 | 10.04 | 10.00 | 0.00 | 0.00 |
| 1 | 0.48 | 26.83 | 13.28 | 12.18 | 9.13 | 0.00 |
| 3 | 0.48 | 393.66 | 11.96 | 34.66 | 54.66 | 9.78 |
| Maximum | 3.02 | 393.66 | 13.28 | 34.66 | 54.66 | 9.78 |
| LPS | 5* | 16904.61 | 19847.70 | 14115.93 | 26692.53 | 15625.32 | 18896.29 |
| PHA | 5* | 7481.95 | 13114.94 | 6329.49 | 13808.00 | 8056.59 | 4728.47 |

Table S2. Cytokine release from human PBMC induced by various immobilized antibodies under HDC conditions (continued).

| **IL-8 (pg/mL)** |  | Donor | | | | | |
| --- | --- | --- | --- | --- | --- | --- | --- |
| Test article | Concentration (μg/well) | Donor 1 | Donor 2 | Donor 3 | Donor 4 | Donor 5 | Donor 6 |
| Panitumumab | 0.1 | 16429.38 | 23152.24 | 10287.60 | 7275.99 | 7785.42 | 18259.97 |
| 0.3 | 22481.80 | 23372.79 | 9334.37 | 26405.07 | 14222.32 | 18228.55 |
| 1 | 32045.35 | 49393.81 | 13571.74 | 27203.29 | 13665.63 | 20854.03 |
| 3 | 51009.52 | 31951.08 | 16244.32 | 27702.00 | 16970.78 | 22699.93 |
| Maximum | 51009.52 | 49393.81 | 16244.32 | 27702.00 | 16970.78 | 22699.93 |
| Trastuzumab | 0.1 | 28104.21 | 35110.17 | 13154.98 | 22450.03 | 30735.73 | 3096.21 |
| 0.3 | 34067.99 | 45221.40 | 20995.74 | 51439.80 | 66221.60 | 41042.06 |
| 1 | 40169.18 | 67511.96 | 24800.97 | 71982.87 | 100188.13 | 43679.34 |
| 3 | 77200.09 | 42117.50 | 36439.99 | 91940.83 | 119145.51 | 41504.00 |
| Maximum | 77200.09 | 67511.96 | 36439.99 | 91940.83 | 119145.51 | 43679.34 |
| Rituximab | 0.1 | 17692.40 | 9927.03 | 3229.30 | 13237.05 | 23815.40 | 11277.87 |
| 0.3 | 46698.03 | 36685.52 | 13395.84 | 22387.51 | 35881.61 | 19413.76 |
| 1 | 44541.96 | 68170.65 | 27336.03 | 46662.71 | 45300.39 | 39075.84 |
| 3 | 49979.53 | 105033.35 | 23955.53 | 69810.69 | 65532.19 | 30761.79 |
| Maximum | 49979.53 | 105033.35 | 27336.03 | 69810.69 | 65532.19 | 39075.84 |
| Alemtuzumab | 0.1 | 25718.52 | 35045.89 | 9006.02 | 18702.24 | 21797.00 | 15026.02 |
| 0.3 | 95936.09 | 75275.10 | 13884.16 | 61523.95 | 43291.27 | 37656.48 |
| 1 | 128443.77 | 124332.64 | 31351.22 | 160494.08 | 99864.53 | 72166.04 |
| 3 | 115393.96 | 167866.20 | 36455.38 | 194140.94 | 149565.12 | 119340.20 |
| Maximum | 128443.77 | 167866.20 | 36455.38 | 194140.94 | 149565.12 | 119340.20 |
| Anti-human CD3 mAb | 0.1 | 33638.62 | 25657.91 | 21074.16 | 34489.11 | 28097.45 | 45531.93 |
| 0.3 | 39808.19 | 52632.63 | 26889.13 | 51058.30 | 49518.36 | 86397.06 |
| 1 | 66101.40 | 67241.72 | 33633.98 | 55790.40 | 69692.83 | 103136.31 |
| 3 | 72208.97 | 71662.26 | 46272.18 | 52292.98 | 60776.96 | 149133.05 |
| Maximum | 72208.97 | 71662.26 | 46272.18 | 55790.40 | 69692.83 | 149133.05 |
| Anti-human CD28 SA mAb | 0.1 | 36831.57 | 35295.22 | 12059.95 | 6289.70 | 19121.48 | 19315.60 |
| 0.3 | 70387.43 | 75575.69 | 20805.32 | 69545.75 | 49953.14 | 56127.92 |
| 1 | 92200.21 | 105200.88 | 32453.60 | 104175.67 | 86431.44 | 115992.75 |
| 3 | 94722.00 | 107346.80 | 35077.26 | 90581.20 | 97729.84 | 125225.48 |
| Maximum | 94722.00 | 107346.80 | 35077.26 | 104175.67 | 97729.84 | 125225.48 |
| PBS | 0 | 2025.16 | 1848.52 | 1240.61 | 3444.58 | 1446.22 | 2798.26 |
| Human IgG1 Ab | 0.1 | 18377.15 | 26648.09 | 3138.59 | 7841.90 | 5627.34 | 2546.57 |
| 0.3 | 47989.68 | 40125.62 | 12693.78 | 32266.66 | 22604.85 | 33340.15 |
| 1 | 98740.06 | 62185.33 | 20173.18 | 110741.93 | 66986.35 | 58910.72 |
| 3 | 101150.36 | 151817.39 | 50078.67 | 143930.07 | 102875.77 | 63001.08 |
| Maximum | 101150.36 | 151817.39 | 50078.67 | 143930.07 | 102875.77 | 63001.08 |
| Human IgG2 Ab | 0.1 | 14789.93 | 11325.09 | 6508.47 | 4064.27 | 4687.25 | 12157.66 |
| 0.3 | 30056.17 | 32756.05 | 9349.99 | 29960.44 | 13218.49 | 19946.46 |
| 1 | 35281.72 | 41750.83 | 18128.52 | 46224.44 | 28762.04 | 46685.69 |
| 3 | 37935.30 | 46976.82 | 27192.73 | 44809.42 | 28471.52 | 60353.88 |
| Maximum | 37935.30 | 46976.82 | 27192.73 | 46224.44 | 28762.04 | 60353.88 |
| Mouse IgG1 Ab | 0.1 | 12517.31 | 6609.49 | 2705.37 | 4065.53 | 4265.35 | 6615.58 |
| 0.3 | 15600.56 | 17187.87 | 6953.30 | 22660.51 | 8256.18 | 7681.87 |
| 1 | 20692.25 | 25614.23 | 17949.84 | 24631.16 | 13441.91 | 14912.39 |
| 3 | 29538.65 | 53946.22 | 10591.44 | 39856.36 | 14645.77 | 23963.88 |
| Maximum | 29538.65 | 53946.22 | 17949.84 | 39856.36 | 14645.77 | 23963.88 |
| Mouse IgG2a Ab | 0.1 | 6519.05 | 8845.42 | 3142.00 | 3486.78 | 5682.40 | 12483.82 |
| 0.3 | 22150.65 | 33901.27 | 21230.65 | 24183.38 | 15274.49 | 24361.91 |
| 1 | 29769.33 | 51619.50 | 26814.46 | 29699.69 | 38771.07 | 42442.05 |
| 3 | 42162.63 | 79922.20 | 27614.74 | 53512.77 | 34980.32 | 67424.28 |
| Maximum | 42162.63 | 79922.20 | 27614.74 | 53512.77 | 38771.07 | 67424.28 |
| LPS | 5* | 150974.77 | 165890.11 | 125429.04 | 170471.57 | 127300.42 | 176273.65 |
| PHA | 5* | 90949.53 | 119016.84 | 92416.54 | 170658.17 | 87774.60 | 128358.45 |

Table S2. Cytokine release from human PBMC induced by various immobilized antibodies under HDC conditions (continued).

| **IL-10 (pg/mL)** |  | Donor | | | | | |
| --- | --- | --- | --- | --- | --- | --- | --- |
| Test article | Concentration (μg/well) | Donor 1 | Donor 2 | Donor 3 | Donor 4 | Donor 5 | Donor 6 |
| Panitumumab | 0.1 | 17.70 | 0.00 | 2.92 | 4.54 | 4.13 | 12.80 |
| 0.3 | 14.97 | 5.45 | 2.15 | 4.69 | 9.85 | 12.80 |
| 1 | 17.70 | 7.39 | 3.69 | 4.54 | 24.41 | 9.97 |
| 3 | 43.59 | 0.00 | 3.88 | 4.54 | 11.29 | 12.80 |
| Maximum | 43.59 | 7.39 | 3.88 | 4.69 | 24.41 | 12.80 |
| Trastuzumab | 0.1 | 27.98 | 7.26 | 19.18 | 0.00 | 0.00 | 25.13 |
| 0.3 | 14.56 | 17.32 | 23.03 | 0.00 | 1.66 | 18.92 |
| 1 | 19.94 | 11.04 | 24.97 | 0.00 | 10.51 | 12.82 |
| 3 | 22.62 | 12.30 | 23.03 | 0.00 | 1.66 | 21.39 |
| Maximum | 27.98 | 17.32 | 24.97 | 0.00 | 10.51 | 25.13 |
| Rituximab | 0.1 | 6.42 | 0.91 | 22.06 | 0.00 | 0.00 | 17.69 |
| 0.3 | 9.14 | 8.52 | 23.03 | 0.00 | 0.00 | 17.69 |
| 1 | 14.56 | 11.04 | 22.06 | 0.00 | 23.73 | 12.82 |
| 3 | 5.05 | 0.00 | 32.86 | 0.00 | 0.00 | 10.42 |
| Maximum | 14.56 | 11.04 | 32.86 | 0.00 | 23.73 | 17.69 |
| Alemtuzumab | 0.1 | 15.90 | 9.78 | 0.00 | 0.00 | 0.00 | 17.69 |
| 0.3 | 11.86 | 8.52 | 23.03 | 0.00 | 0.00 | 25.13 |
| 1 | 17.25 | 27.35 | 25.95 | 0.00 | 3.48 | 17.69 |
| 3 | 17.25 | 68.65 | 27.91 | 53.29 | 32.55 | 92.64 |
| Maximum | 17.25 | 68.65 | 27.91 | 53.29 | 32.55 | 92.64 |
| Anti-human CD3 mAb | 0.1 | 2755.90 | 6672.50 | 1540.04 | 3720.21 | 4293.88 | 1436.17 |
| 0.3 | 4406.37 | 8730.58 | 860.57 | 4571.87 | 8966.44 | 5746.33 |
| 1 | 4493.76 | 4569.60 | 1155.83 | 1883.01 | 7219.90 | 2861.43 |
| 3 | 1740.89 | 2524.53 | 822.21 | 1262.58 | 3330.70 | 1876.17 |
| Maximum | 4493.76 | 8730.58 | 1540.04 | 4571.87 | 8966.44 | 5746.33 |
| Anti-human CD28 SA mAb | 0.1 | 43.59 | 13.40 | 5.25 | 7.81 | 24.41 | 18.49 |
| 0.3 | 187.16 | 231.85 | 60.52 | 520.64 | 382.40 | 492.55 |
| 1 | 987.77 | 1462.00 | 210.45 | 1352.35 | 937.89 | 1251.11 |
| 3 | 1455.93 | 1821.34 | 371.63 | 1949.14 | 2031.61 | 1493.96 |
| Maximum | 1455.93 | 1821.34 | 371.63 | 1949.14 | 2031.61 | 1493.96 |
| PBS | 0 | 4.73 | 1.27 | 1.78 | 5.45 | 5.29 | 4.85 |
| Human IgG1 Ab | 0.1 | 7.78 | 9.78 | 19.18 | 0.00 | 0.00 | 11.62 |
| 0.3 | 6.42 | 0.91 | 22.06 | 0.00 | 0.00 | 17.69 |
| 1 | 22.62 | 8.52 | 19.18 | 0.00 | 0.00 | 20.15 |
| 3 | 17.25 | 46.11 | 0.00 | 0.00 | 12.23 | 22.63 |
| Maximum | 22.62 | 46.11 | 22.06 | 0.00 | 12.23 | 22.63 |
| Human IgG2 Ab | 0.1 | 9.64 | 0.00 | 3.50 | 2.27 | 18.55 | 18.49 |
| 0.3 | 23.27 | 0.00 | 1.77 | 4.83 | 9.85 | 12.80 |
| 1 | 34.75 | 15.45 | 1.39 | 6.31 | 18.55 | 15.64 |
| 3 | 26.10 | 5.45 | 2.72 | 5.72 | 15.64 | 21.33 |
| Maximum | 34.75 | 15.45 | 3.50 | 6.31 | 18.55 | 21.33 |
| Mouse IgG1 Ab | 0.1 | 15.87 | 0.00 | 3.50 | 3.39 | 4.13 | 4.33 |
| 0.3 | 14.97 | 0.00 | 3.69 | 4.83 | 11.29 | 18.49 |
| 1 | 14.07 | 0.00 | 4.47 | 7.06 | 18.55 | 9.97 |
| 3 | 14.97 | 9.37 | 2.72 | 5.72 | 6.97 | 15.64 |
| Maximum | 15.87 | 9.37 | 4.47 | 7.06 | 18.55 | 18.49 |
| Mouse IgG2a Ab | 0.1 | 20.47 | 0.00 | 2.53 | 3.68 | 18.55 | 8.56 |
| 0.3 | 13.17 | 0.00 | 2.15 | 4.54 | 9.85 | 9.97 |
| 1 | 29.92 | 1.71 | 2.92 | 5.42 | 12.74 | 7.15 |
| 3 | 16.78 | 9.37 | 2.92 | 6.61 | 18.55 | 21.33 |
| Maximum | 29.92 | 9.37 | 2.92 | 6.61 | 18.55 | 21.33 |
| LPS | 5* | 1204.73 | 1265.25 | 543.29 | 2526.00 | 933.78 | 1156.54 |
| PHA | 5* | 1952.31 | 1927.31 | 509.66 | 4385.13 | 2777.36 | 1977.42 |

Table S2. Cytokine release from human PBMC induced by various immobilized antibodies under HDC conditions (continued).

| **MIP-1α (pg/mL)** |  | Donor | | | | | |
| --- | --- | --- | --- | --- | --- | --- | --- |
| Test article | Concentration  (μg/well) | Donor 1 | Donor 2 | Donor 3 | Donor 4 | Donor 5 | Donor 6 |
| Panitumumab | 0.1 | 3606.09 | 9047.87 | 1971.23 | 584.47 | 1403.25 | 1271.95 |
| 0.3 | 4103.66 | 8811.44 | 3635.66 | 8910.60 | 3911.90 | 2188.49 |
| 1 | 5539.43 | 14729.20 | 5561.87 | 8741.94 | 3962.59 | 2740.76 |
| 3 | 6510.26 | 9558.33 | 5772.59 | 8669.77 | 4135.75 | 2217.79 |
| Maximum | 6510.26 | 14729.20 | 5772.59 | 8910.60 | 4135.75 | 2740.76 |
| Trastuzumab | 0.1 | 6239.90 | 15395.28 | 6997.85 | 6855.88 | 5740.31 | 155.65 |
| 0.3 | 7437.73 | 13335.98 | 13737.91 | 30130.95 | 12449.16 | 3158.92 |
| 1 | 9752.09 | 15436.56 | 14636.96 | 30171.36 | 13961.99 | 2171.08 |
| 3 | 15015.89 | 11102.34 | 18652.10 | 34486.98 | 14552.37 | 2228.50 |
| Maximum | 15015.89 | 15436.56 | 18652.10 | 34486.98 | 14552.37 | 3158.92 |
| Rituximab | 0.1 | 4059.21 | 5093.74 | 224.47 | 2673.62 | 4904.70 | 445.98 |
| 0.3 | 10500.20 | 11450.12 | 6018.51 | 8584.47 | 6897.54 | 1206.93 |
| 1 | 13457.15 | 15647.79 | 12923.26 | 25814.40 | 7488.81 | 2195.84 |
| 3 | 11677.39 | 23256.41 | 11465.43 | 31563.59 | 9470.53 | 1633.83 |
| Maximum | 13457.15 | 23256.41 | 12923.26 | 31563.59 | 9470.53 | 2195.84 |
| Alemtuzumab | 0.1 | 3180.60 | 10625.33 | 2709.56 | 3485.10 | 3432.55 | 637.40 |
| 0.3 | 20550.98 | 18644.64 | 5068.75 | 21767.81 | 11025.35 | 2402.39 |
| 1 | 32538.24 | 22651.09 | 9696.80 | 36266.84 | 19051.59 | 3762.64 |
| 3 | 21499.71 | 24181.68 | 11987.64 | 61982.79 | 19284.82 | 4510.83 |
| Maximum | 32538.24 | 24181.68 | 11987.64 | 61982.79 | 19284.82 | 4510.83 |
| Anti-human CD3 mAb | 0.1 | 5963.86 | 10860.22 | 9526.76 | 8100.02 | 10301.32 | 5920.16 |
| 0.3 | 6584.91 | 30972.89 | 12279.78 | 24453.13 | 15549.22 | 9710.42 |
| 1 | 12410.30 | 35585.67 | 22319.77 | 27605.12 | 37448.61 | 10590.67 |
| 3 | 12230.58 | 34097.90 | 20158.33 | 29695.18 | 27176.98 | 8400.00 |
| Maximum | 12410.30 | 35585.67 | 22319.77 | 29695.18 | 37448.61 | 10590.67 |
| Anti-human CD28 SA mAb | 0.1 | 4894.89 | 10008.87 | 1860.13 | 641.82 | 4312.43 | 1862.07 |
| 0.3 | 14165.45 | 24895.11 | 7889.94 | 29930.54 | 19072.91 | 5666.74 |
| 1 | 12011.53 | 25063.44 | 20425.01 | 32234.14 | 25505.98 | 7541.03 |
| 3 | 16912.07 | 35978.87 | 20199.81 | 34192.01 | 33067.04 | 7292.73 |
| Maximum | 16912.07 | 35978.87 | 20425.01 | 34192.01 | 33067.04 | 7541.03 |
| PBS | 0 | 25.99 | 49.64 | 144.20 | 76.32 | 41.49 | 44.19 |
| Human IgG1 Ab | 0.1 | 5360.33 | 8767.20 | 171.71 | 545.94 | 414.01 | 106.41 |
| 0.3 | 8672.04 | 10368.82 | 6544.18 | 12784.57 | 4743.84 | 1591.46 |
| 1 | 13006.21 | 12309.38 | 9401.91 | 33648.80 | 9345.34 | 2429.44 |
| 3 | 13796.42 | 21128.57 | 18454.63 | 35609.63 | 11672.98 | 2630.95 |
| Maximum | 13796.42 | 21128.57 | 18454.63 | 35609.63 | 11672.98 | 2630.95 |
| Human IgG2 Ab | 0.1 | 1258.91 | 2630.71 | 753.20 | 69.20 | 311.54 | 403.66 |
| 0.3 | 4135.06 | 10164.22 | 1354.65 | 10062.32 | 2941.05 | 2402.61 |
| 1 | 5433.46 | 10896.22 | 4904.42 | 10960.04 | 4926.14 | 2500.86 |
| 3 | 6129.68 | 13850.33 | 7619.51 | 8804.60 | 4875.09 | 2547.04 |
| Maximum | 6129.68 | 13850.33 | 7619.51 | 10960.04 | 4926.14 | 2547.04 |
| Mouse IgG1 Ab | 0.1 | 1054.07 | 1355.47 | 267.68 | 246.73 | 633.47 | 238.52 |
| 0.3 | 1818.89 | 5342.81 | 1110.81 | 5948.39 | 851.46 | 203.41 |
| 1 | 3089.58 | 6615.66 | 2633.68 | 9141.53 | 2083.58 | 566.59 |
| 3 | 4193.50 | 9652.53 | 2396.17 | 8141.64 | 1918.47 | 852.71 |
| Maximum | 4193.50 | 9652.53 | 2633.68 | 9141.53 | 2083.58 | 852.71 |
| Mouse IgG2a Ab | 0.1 | 222.30 | 1606.04 | 94.10 | 53.63 | 613.54 | 305.76 |
| 0.3 | 2956.59 | 9952.28 | 4651.29 | 5459.59 | 3448.55 | 1736.14 |
| 1 | 4805.52 | 16412.90 | 6096.66 | 10915.54 | 6415.73 | 2544.90 |
| 3 | 5932.54 | 18105.69 | 10300.69 | 10482.46 | 6229.75 | 2976.29 |
| Maximum | 5932.54 | 18105.69 | 10300.69 | 10915.54 | 6415.73 | 2976.29 |
| LPS | 5* | 16374.55 | 13633.47 | 15273.37 | 24268.48 | 9947.23 | 7357.23 |
| PHA | 5* | 13483.89 | 28087.93 | 13570.96 | 36468.71 | 17294.16 | 8193.67 |
| Ab: antibody, mAb: monoclonal antibody, HDC: high-density pre-culture, LPS: lipopolysaccharide, PHA: phytohemagglutinin, SA: super-agonist.  *: Units of concentration for LPS and PHA are g/mL. Each cytokine level was calculated from the standard curve by the usage of BioPlex® system. When the value was not calculated, the value was regarded as “0”. | | | | | | | |
